# Supplementary material for: Genomic and Molecular Identification of Genes Contributing to the Caspofungin Paradoxical Effect in Aspergillus fumigatus
Source: PubMed Central journal article supplement (PMC9603777; doi:10.1128/spectrum.00519-22), 2022-09-12
Supplement: spectrum.00519-22-s0001.pdf [file spectrum.00519-22-s0001.pdf]

**Table S1. Growth rate (colony diameter in mm) and caspofungin paradoxical effect (Recovery Rate) quantification of 67 *A. fumigatus* isolates in the presence of 0, 0.125, 0.25, 0.5, 1, and 8 ug/ml caspofungin.**

| Isolate    | Minimal media r1 | Minimal media r2 | Caspo 0.125ug/ml r1 | Caspo 0.125ug/ml r2 | Caspo 0.250ug/ml r1 | Caspo 0.250ug/ml r2 | Caspo 0.500ug/ml r1 | Caspo 0.500ug/ml r2 | Caspo 1ug/ml r1 | Caspo 1ug/ml r2 | Capo 8ug/ml r1 | Capo 8ug/ml r2 | Recovery Rate | Source of Strain                                                                  | SRA Accession Number |
|------------|------------------|------------------|---------------------|---------------------|---------------------|---------------------|---------------------|---------------------|-----------------|-----------------|----------------|----------------|---------------|-----------------------------------------------------------------------------------|----------------------|
| 17993925   | 6.5              | 6.4              | 3                   | 3.2                 | 2.4                 | 2.5                 | 1.5                 | 1.6                 | 1               | 1               | 3.8            | 3.7            | 0.504587156   | Current study                                                                     | SRR16287627          |
| 200-89320  | 6.2              | 6.3              | 3.2                 | 3.1                 | 2.1                 | 2.3                 | 1.2                 | 1.1                 | 1               | 1               | 3.8            | 3.9            | 0.542857143   | Current study                                                                     | SRR16287628          |
| A1163      | 6.8              | 6.7              | 3.5                 | 3.5                 | 2.6                 | 2.8                 | 1.7                 | 1.7                 | 1.1             | 1.2             | 3.5            | 3.5            | 0.419642857   | Garcia-Rubio et al., 2018                                                         | SRR068950            |
| Af293      | 6                | 6.1              | 3.3                 | 3.2                 | 1.4                 | 1.4                 | 1                   | 1.1                 | 0.7             | 0.8             | 3.8            | 4              | 0.594339623   | <a href="http://www.westerdijknstitute.nl/">http://www.westerdijknstitute.nl/</a> | SRR068952            |
| AF72       | 3.2              | 3                | 1                   | 1                   | 1                   | 0.9                 | 0.5                 | 0.6                 | 0.5             | 0.5             | 0.8            | 0.9            | 0.134615385   | Mosquera et al., 2002                                                             | SRR617721            |
| Afs35      | 6.5              | 6.5              | 2.8                 | 2.8                 | 2                   | 2.1                 | 1.4                 | 1.5                 | 1.2             | 1.1             | 3.7            | 3.5            | 0.457943925   | Kang et al., 2020                                                                 | DRR146814            |
| Afu-AF10   | 8                | 7.9              | 3                   | 3.1                 | 2                   | 1.8                 | 1.3                 | 1.2                 | 1               | 0.9             | 1              | 1              | 0.007142857   | Chiba University, unpublished                                                     | SRR334209            |
| ATCC204305 | 8                | 8                | 3                   | 3.1                 | 2.3                 | 2.3                 | 1.5                 | 1.4                 | 1               | 1               | 2.7            | 2.7            | 0.242857143   | Garcia-Rubio et al., 2018                                                         | SRR7418943           |
| ATCC46645  | 8                | 8                | 3.2                 | 3.1                 | 2                   | 2.1                 | 1.5                 | 1.5                 | 1.5             | 1.5             | 4              | 4              | 0.384615385   | Garcia-Rubio et al., 2018                                                         | SRR7418935           |
| CEA10      | 8.5              | 8.5              | 3                   | 2.9                 | 1.6                 | 1.6                 | 1.6                 | 1.6                 | 1.6             | 1.5             | 4.4            | 4.5            | 0.417266187   | Fedorova et al., 2008                                                             | SRR7418934           |
| CM2141     | 8                | 8                | 4                   | 3.9                 | 2.7                 | 2.7                 | 1.9                 | 1.8                 | 1.1             | 1.1             | 4              | 4.1            | 0.427536232   | Garcia-Rubio et al., 2018                                                         | SRR7418947           |
| CM237      | 8                | 8.1              | 4                   | 4                   | 2.5                 | 2.5                 | 1.7                 | 1.6                 | 1.5             | 1.4             | 3              | 3              | 0.234848485   | Garcia-Rubio et al., 2018                                                         | SRR7418942           |
| CM3248     | 7.5              | 7.6              | 3                   | 3                   | 1.9                 | 1.9                 | 1.3                 | 1.4                 | 1               | 1               | 1              | 1              | 0             | Garcia-Rubio et al., 2018                                                         | SRR7418945           |
| CM5419     | 7.5              | 7.6              | 4                   | 3.9                 | 3                   | 3                   | 2.1                 | 2                   | 1.5             | 1.6             | 4.2            | 4.3            | 0.45          | Garcia-Rubio et al., 2018                                                         | SRR7418944           |
| CM5757     | 8                | 8                | 3.8                 | 3.8                 | 3.1                 | 3                   | 2                   | 2                   | 2.5             | 2.4             | 4              | 4              | 0.333333333   | Garcia-Rubio et al., 2018                                                         | SRR7418949           |
| CM6126     | 8                | 8                | 4                   | 4                   | 3.5                 | 3.5                 | 2.5                 | 2.6                 | 1.5             | 1.6             | 4.3            | 4.2            | 0.418604651   | Garcia-Rubio et al., 2018                                                         | SRR7418937           |
| CM6458     | 8                | 7.9              | 5                   | 4.9                 | 4.3                 | 4.2                 | 3                   | 3.1                 | 1.5             | 1.5             | 4.5            | 4.5            | 0.465116279   | Garcia-Rubio et al., 2018                                                         | SRR7418936           |
| CM7510     | 8                | 8                | 3.3                 | 3.1                 | 2.8                 | 2.9                 | 1.7                 | 1.7                 | 1.1             | 1               | 3.8            | 3.9            | 0.402877698   | Garcia-Rubio et al., 2018                                                         | SRR7418939           |
| CM7555     | 8                | 7.9              | 5.1                 | 5.1                 | 4.8                 | 4.7                 | 3.4                 | 3.5                 | 2.6             | 2.5             | 4.7            | 4.5            | 0.37962963    | Garcia-Rubio et al., 2018                                                         | SRR7418938           |
| CNM-CM2495 | 7.5              | 7.5              | 3.2                 | 3.1                 | 1.5                 | 1.5                 | 1                   | 1                   | 1               | 1               | 1              | 1              | 0             | Garcia-Rubio et al., 2018                                                         | SRR7418930           |
| CNM-CM2730 | 8                | 7.9              | 2.8                 | 2.8                 | 1                   | 1                   | 1                   | 1                   | 1               | 1               | 1              | 1              | 0             | Garcia-Rubio et al., 2018                                                         | SRR7418924           |
| CNM-CM2733 | 7.5              | 7.5              | 3.2                 | 3.2                 | 1.3                 | 1.4                 | 1                   | 1                   | 1               | 1               | 1              | 1              | 0             | Garcia-Rubio et al., 2018                                                         | SRR7418923           |
| CNM-CM3249 | 7.2              | 7.2              | 2.7                 | 2.7                 | 1.5                 | 1.5                 | 1                   | 1                   | 1               | 1               | 1              | 0.9            | 0             | Garcia-Rubio et al., 2018                                                         | SRR7418926           |

|            |     |      |     |     |     |     |     |     |     |     |     |     |             |                           |             |
|------------|-----|------|-----|-----|-----|-----|-----|-----|-----|-----|-----|-----|-------------|---------------------------|-------------|
| CNM-CM3262 | 7.5 | 7.5  | 3.7 | 3.6 | 2.5 | 2.5 | 1.6 | 1.5 | 1.2 | 1.1 | 4.5 | 4.5 | 0.527559055 | Garcia-Rubio et al., 2018 | SRR7418922  |
| CNM-CM3720 | 6.4 | 6.5  | 1.8 | 1.8 | 1.3 | 1.3 | 1   | 1   | 1   | 1   | 2.5 | 2.8 | 0.302752294 | Garcia-Rubio et al., 2018 | SRR7418927  |
| CNM-CM4602 | 7.8 | 7.9  | 2.6 | 2.5 | 1.5 | 1.5 | 1   | 1   | 0.7 | 0.8 | 1   | 1   | 0.035211268 | Garcia-Rubio et al., 2018 | SRR7418928  |
| CNM-CM4946 | 7.5 | 7.57 | 2.7 | 2.6 | 1.5 | 1.6 | 0.9 | 0.8 | 0.8 | 0.9 | 0.9 | 0.9 | 0.007479432 | Garcia-Rubio et al., 2018 | SRR7418948  |
| CNM-CM7560 | 7.5 | 7.5  | 3.7 | 3.7 | 2.8 | 2.9 | 1.8 | 1.9 | 1   | 0.9 | 1   | 1   | 0.007633588 | Garcia-Rubio et al., 2018 | SRR7418925  |
| CNM-CM7632 | 7.8 | 7.7  | 3   | 3.1 | 2.1 | 2   | 1.4 | 1.5 | 1   | 1   | 1   | 1   | 0           | Garcia-Rubio et al., 2018 | SRR7418941  |
| CNM-CM8057 | 6.8 | 6.7  | 3   | 3.1 | 0.6 | 0.6 | 1.5 | 1.6 | 1.2 | 1.1 | 4   | 4   | 0.552845528 | Garcia-Rubio et al., 2018 | SRR10592633 |
| CNM-CM8686 | 7   | 7.2  | 3   | 3.1 | 1.7 | 1.7 | 1.2 | 1.1 | 1.2 | 1.1 | 4.2 | 4.1 | 0.504201681 | Garcia-Rubio et al., 2018 | SRR10592630 |
| CNM-CM8689 | 7   | 7    | 3.2 | 3.2 | 2.2 | 2.1 | 1.2 | 1.2 | 1   | 1   | 3.2 | 3.1 | 0.358333333 | Garcia-Rubio et al., 2018 | SRR10592629 |
| CNM-CM8714 | 7.5 | 7.6  | 3.3 | 3.4 | 2   | 2.1 | 1.3 | 1.3 | 1.3 | 1.4 | 4.1 | 1.1 | 0.208       | Garcia-Rubio et al., 2018 | SRR10592632 |
| CNM-CM8812 | 7   | 7.1  | 3   | 3   | 1.3 | 1.2 | 1.1 | 1   | 0.9 | 1   | 1   | 1   | 0.008196721 | Garcia-Rubio et al., 2018 | SRR10592631 |
| F12041     | 6.5 | 6.2  | 2.5 | 2.6 | 2.3 | 2.2 | 1.3 | 1.2 | 1   | 1   | 3.3 | 3   | 0.401869159 | Bromley et al., 2017      | SRR617723   |
| F12636     | 6   | 6    | 2.6 | 2.5 | 2.3 | 2.1 | 1.3 | 1.3 | 1   | 1   | 3.1 | 3   | 0.41        | Bromley et al., 2017      | SRR617725   |
| F13535     | 7   | 7    | 2.3 | 2.5 | 2   | 2.1 | 1.5 | 1.4 | 1   | 0.9 | 2.5 | 2.5 | 0.256198347 | Bromley et al., 2017      | SRR617726   |
| F13952     | 5.2 | 5.1  | 2   | 2   | 1.3 | 1.3 | 1.2 | 1.1 | 1   | 1   | 2.5 | 2.4 | 0.34939759  | Bromley et al., 2017      | SRR617728   |
| F14946     | 6.5 | 6.5  | 2.5 | 2.5 | 1.5 | 1.4 | 1   | 1   | 1   | 0.9 | 2.6 | 2.5 | 0.288288288 | Bromley et al., 2017      | SRR159252   |
| F17764     | 7   | 7.1  | 2.5 | 2.5 | 1.9 | 1.9 | 1.2 | 1   | 1   | 1   | 2.5 | 2.5 | 0.247933884 | Balajee et al., 2007      | SRR617745   |
| F7763      | 7   | 6.8  | 2.5 | 2.5 | 2.1 | 2.1 | 1.5 | 1.3 | 1   | 1   | 1   | 1   | 0           | Lepak et al., 2013        | SRR617744   |
| IF1SW-F4   | 6.6 | 6.5  | 3.5 | 3.4 | 2.1 | 1.9 | 1   | 1   | 0.9 | 0.9 | 3.9 | 3.8 | 0.522123894 | Knox et a., 2016          | SRR4002444  |
| IFM55369   | 6.2 | 6.2  | 2.5 | 2.3 | 1.2 | 1   | 0.9 | 0.8 | 1   | 1   | 1   | 1   | 0.028037383 | Hagiwara et al., 2014     | DRX013572   |
| IFM58026   | 5   | 5.1  | 3.7 | 3.8 | 2   | 2.1 | 1.5 | 1.5 | 1.6 | 1.5 | 1.4 | 1.5 | 0           | Hagiwara et al., 2014     | DRX015829   |
| IFM58029   | 6.2 | 6    | 4.5 | 4.3 | 1.9 | 1.9 | 1.7 | 1.6 | 1.4 | 1.6 | 1   | 1   | 0           | Hagiwara et al., 2014     | DRX015830   |
| IFM59056   | 7   | 7    | 4.8 | 4.7 | 3.5 | 3.6 | 1.5 | 1.7 | 1   | 1   | 2   | 2.1 | 0.175       | Hagiwara et al., 2014     | DRX013573   |
| IFM59073   | 7.2 | 7.2  | 3.7 | 3.5 | 2   | 2.1 | 1.9 | 1.8 | 0.9 | 1   | 1   | 1   | 0.008       | Hagiwara et al., 2014     | DRX013577   |
| IFM59359   | 4.3 | 4.2  | 2.6 | 2.6 | 1.5 | 1.5 | 1.3 | 1.2 | 1.5 | 1.6 | 2   | 2   | 0.25        | Hagiwara et al., 2014     | DRX013574   |
| IFM59361   | 4   | 4.1  | 0.4 | 0.4 | 0.5 | 0.4 | 0.5 | 0.6 | 0.6 | 0.5 | 0.9 | 0.8 | 0.123287671 | Hagiwara et al., 2014     | DRX013575   |
| IFM59365   | 7   | 7.1  | 4.2 | 4.1 | 3   | 3   | 1.7 | 1.6 | 1   | 1   | 2.6 | 2.8 | 0.280991736 | Hagiwara et al., 2014     | DRX015832   |
| IFM59777   | 7   | 7    | 5.3 | 5.4 | 3   | 3.1 | 1.5 | 1.4 | 1.4 | 1.5 | 1   | 1   | 0           | Hagiwara et al., 2014     | DRX015833   |
| IFM60514   | 2   | 2.1  | 1.8 | 1.8 | 1.6 | 1.7 | 1.6 | 1.6 | 1.8 | 1.7 | 2.5 | 2.4 | 1.888888889 | Hagiwara et al., 2014     | DRX013576   |
| IFM61118   | 7.5 | 7.5  | 3.4 | 3.5 | 1.9 | 2   | 1.1 | 1   | 1   | 1.1 | 1   | 0.9 | 0           | Hagiwara et al., 2014     | DRX015834   |
| IFM61407   | 6.5 | 6.5  | 3.5 | 3.7 | 1.2 | 1.1 | 1   | 1.1 | 0.9 | 1   | 0.8 | 0.7 | 0           | Hagiwara et al., 2014     | DRX013578   |
| IFM61578   | 6.2 | 6.2  | 2.1 | 2   | 1.3 | 1.4 | 1   | 1   | 1   | 1   | 0.9 | 1   | 0           | Hagiwara et al., 2014     | DRX015835   |

|           |     |     |     |     |     |     |     |     |     |     |     |     |             |                           |            |
|-----------|-----|-----|-----|-----|-----|-----|-----|-----|-----|-----|-----|-----|-------------|---------------------------|------------|
| IFM61610  | 4.1 | 4.1 | 3.5 | 3.6 | 2.3 | 2.4 | 2   | 2.1 | 1.7 | 1.8 | 3.5 | 3.5 | 0.744680851 | Hagiwara et al., 2014     | DRX013579  |
| IFM62516  | 5   | 5.1 | 3.3 | 3.2 | 2.5 | 2.5 | 1.6 | 1.6 | 1.4 | 1.5 | 2   | 1.9 | 0.138888889 | Hagiwara et al., 2014     | DRX015837  |
| ISSFT-021 | 6.5 | 6.5 | 3   | 3.1 | 2.3 | 2.5 | 1   | 1.1 | 1   | 1   | 3.6 | 3.7 | 0.481818182 | Knox et a., 2016          | SRR4002443 |
| MO54056   | 7.4 | 7.3 | 5.1 | 5   | 2.4 | 2.3 | 1.2 | 1.1 | 1   | 1   | 1   | 1.1 | 0.007874016 | Lind et al., 2017         | SRR5676587 |
| MO68507   | 7.5 | 7.5 | 3.8 | 3.7 | 2   | 2   | 1.2 | 1   | 1   | 1   | 1   | 0.9 | 0           | Lind et al., 2017         | SRR5676586 |
| MO69250   | 7.5 | 7.6 | 4   | 4   | 2.8 | 2.7 | 1.5 | 1.5 | 0.9 | 1   | 1.3 | 1.5 | 0.068181818 | Lind et al., 2017         | SRR5676589 |
| MO78722   | 7.5 | 7.4 | 4.6 | 4.7 | 2.5 | 2.6 | 1.6 | 1.5 | 1.2 | 1.2 | 3.8 | 3.7 | 0.408       | Lind et al., 2017         | SRR5676591 |
| MO79587   | 6.5 | 6.5 | 4.5 | 4.4 | 1.6 | 1.5 | 1   | 1   | 1   | 0.9 | 2.5 | 2.5 | 0.279279279 | Lind et al., 2017         | SRR5676590 |
| MO89263   | 7.5 | 7.4 | 4   | 4.1 | 2.5 | 2.6 | 1   | 1   | 1   | 1   | 1   | 1   | 0           | Lind et al., 2017         | SRR5676593 |
| MO91298   | 7   | 7.1 | 3.3 | 3   | 1.9 | 2   | 1.1 | 1.2 | 1   | 1   | 1.1 | 1   | 0.008264463 | Lind et al., 2017         | SRR5676592 |
| TP-12     | 7.5 | 7.5 | 3   | 2.9 | 2.1 | 2   | 1   | 1   | 0.9 | 0.9 | 3.2 | 3.1 | 0.340909091 | Garcia-Rubio et al., 2018 | SRR7418940 |
| TP32      | 7.8 | 7.9 | 2.1 | 2   | 1.7 | 1.8 | 1   | 1   | 1   | 1   | 1   | 1   | 0           | Garcia-Rubio et al., 2018 | SRR7418946 |

\*MM = minimal media, Caspo = caspofungin, growth values = colony diameter (mm)

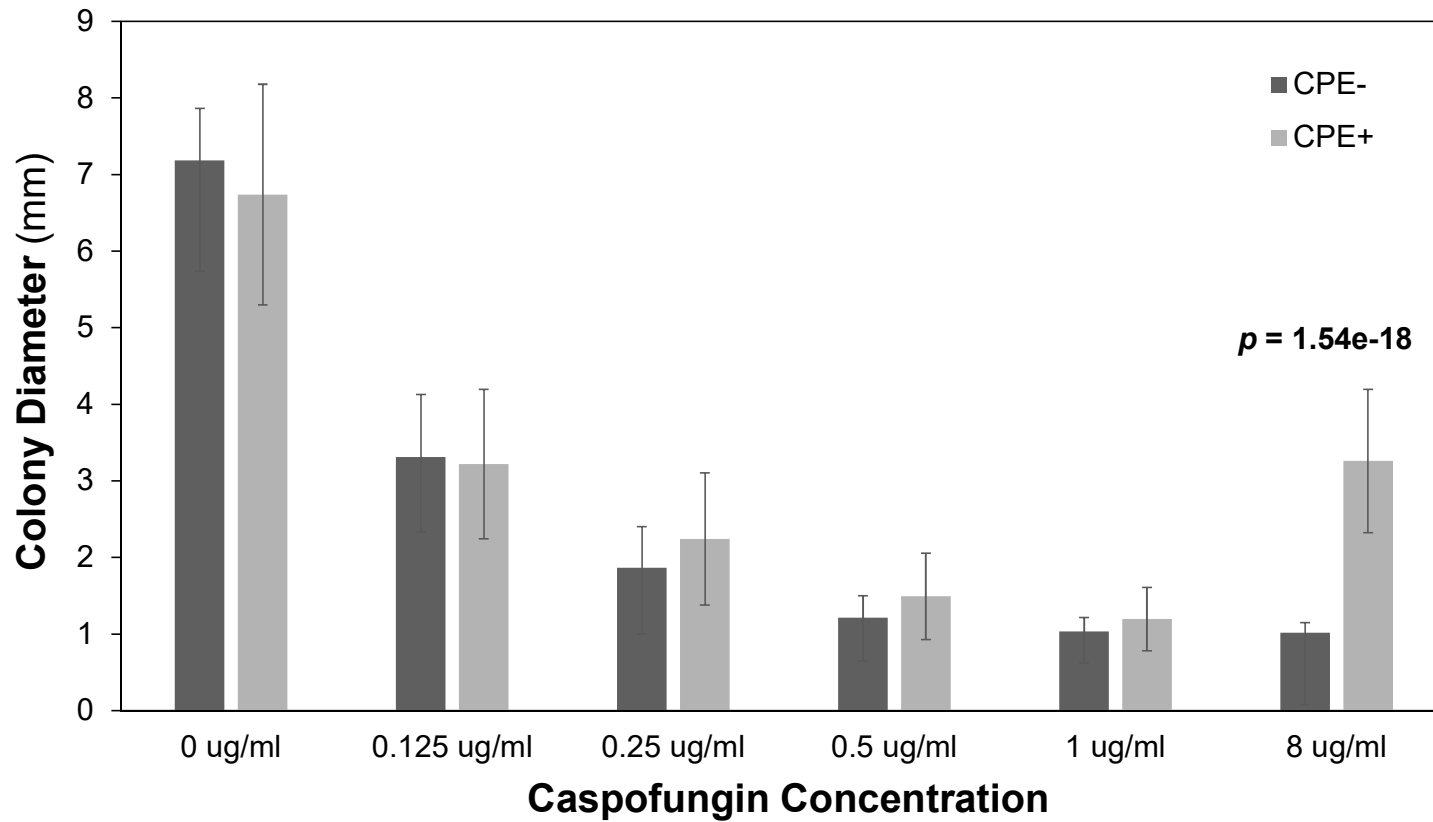

**Figure S1. Growth of CPE+ (light gray) and CPE- (dark gray) isolates at varying concentrations of caspofungin.** Growth differences between CPE- and CPE+ isolates only significantly differed at 8 ug/ml, where CPE+ grew faster. All other p-values > 0.05. Error bars represent standard deviation. N = 41 CPE+ and N = 26 CPE-.

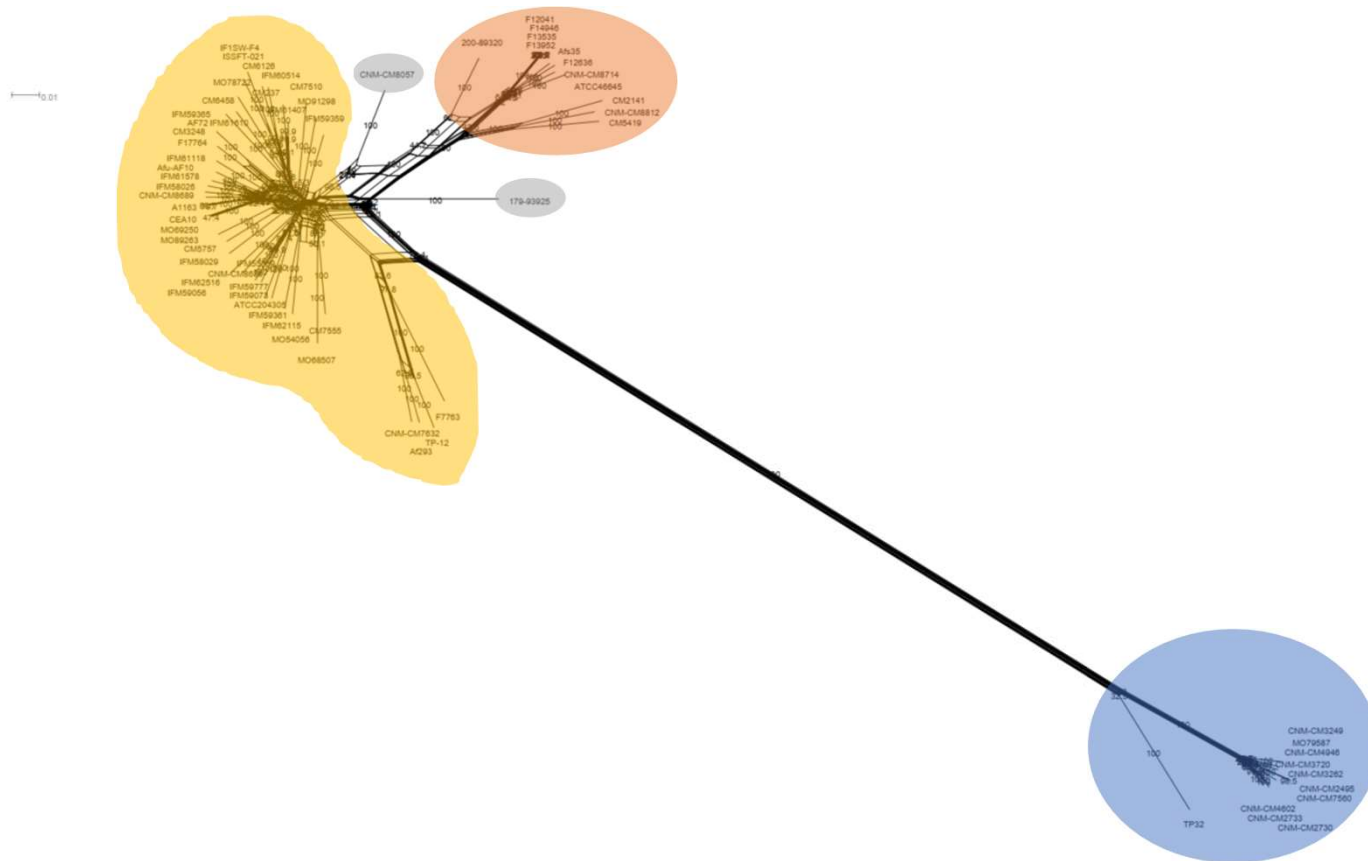

**Figure S2. Phylogenetic network of the 67 *A. fumigatus* isolates inferred from 6,492 SNPs distributed across the genome.** The neighbornet method was used to construct the network with 1,000 bootstrap replicates. Colors represent the major populations identified through PCA analysis (Figure 2).

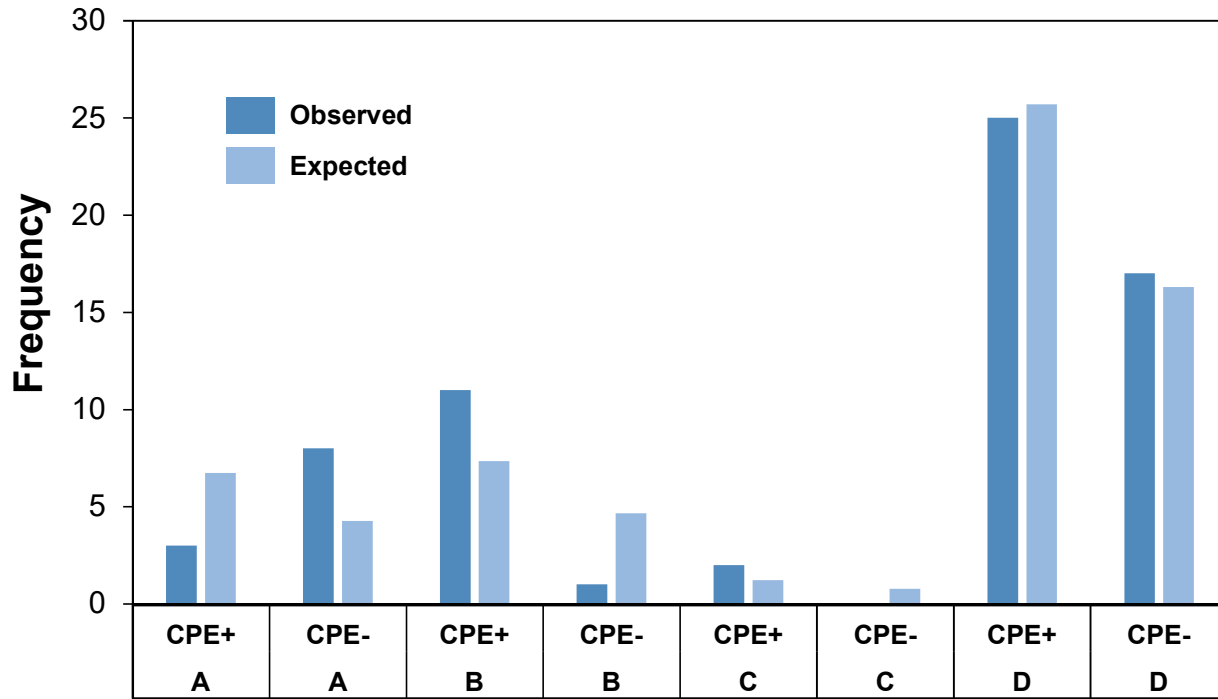

**Figure S3. Observed versus expected frequencies of CPE+ and CPE- isolates across populations A-D assuming a random distribution.** Dark blue and light blue represent observed and expected frequencies. A-D represent the 4 *A. fumigatus* populations.

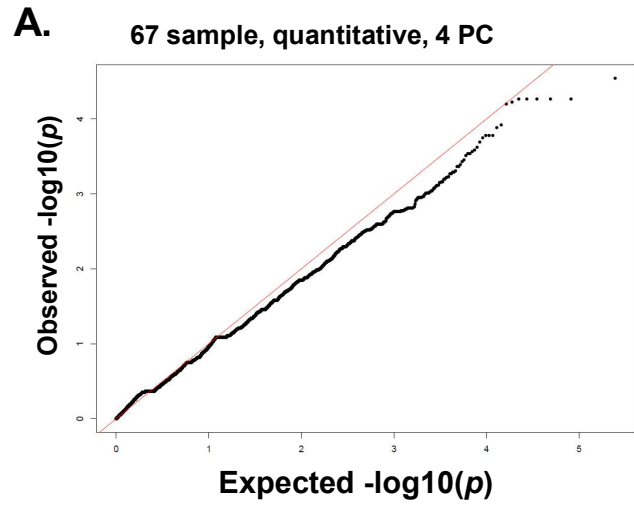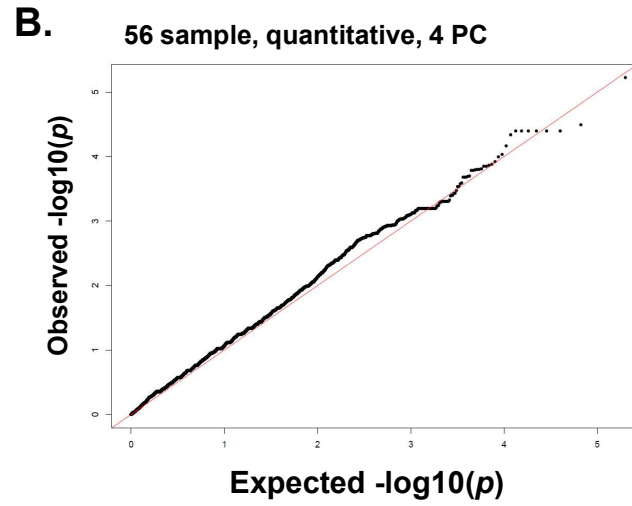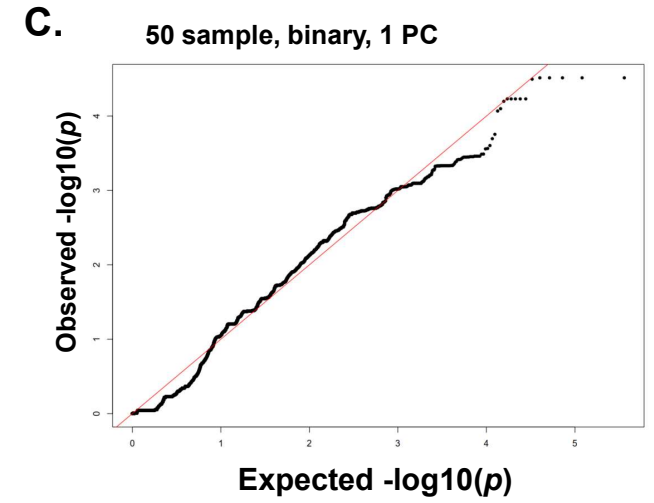

**Figure S4.** Quantile-Quantile plots of observed (Y-axis) vs. expected (X-axis)  $p$ -values in the (A) 67-sample, (B) 56-sample, and (C) 50-sample GWA analyses.

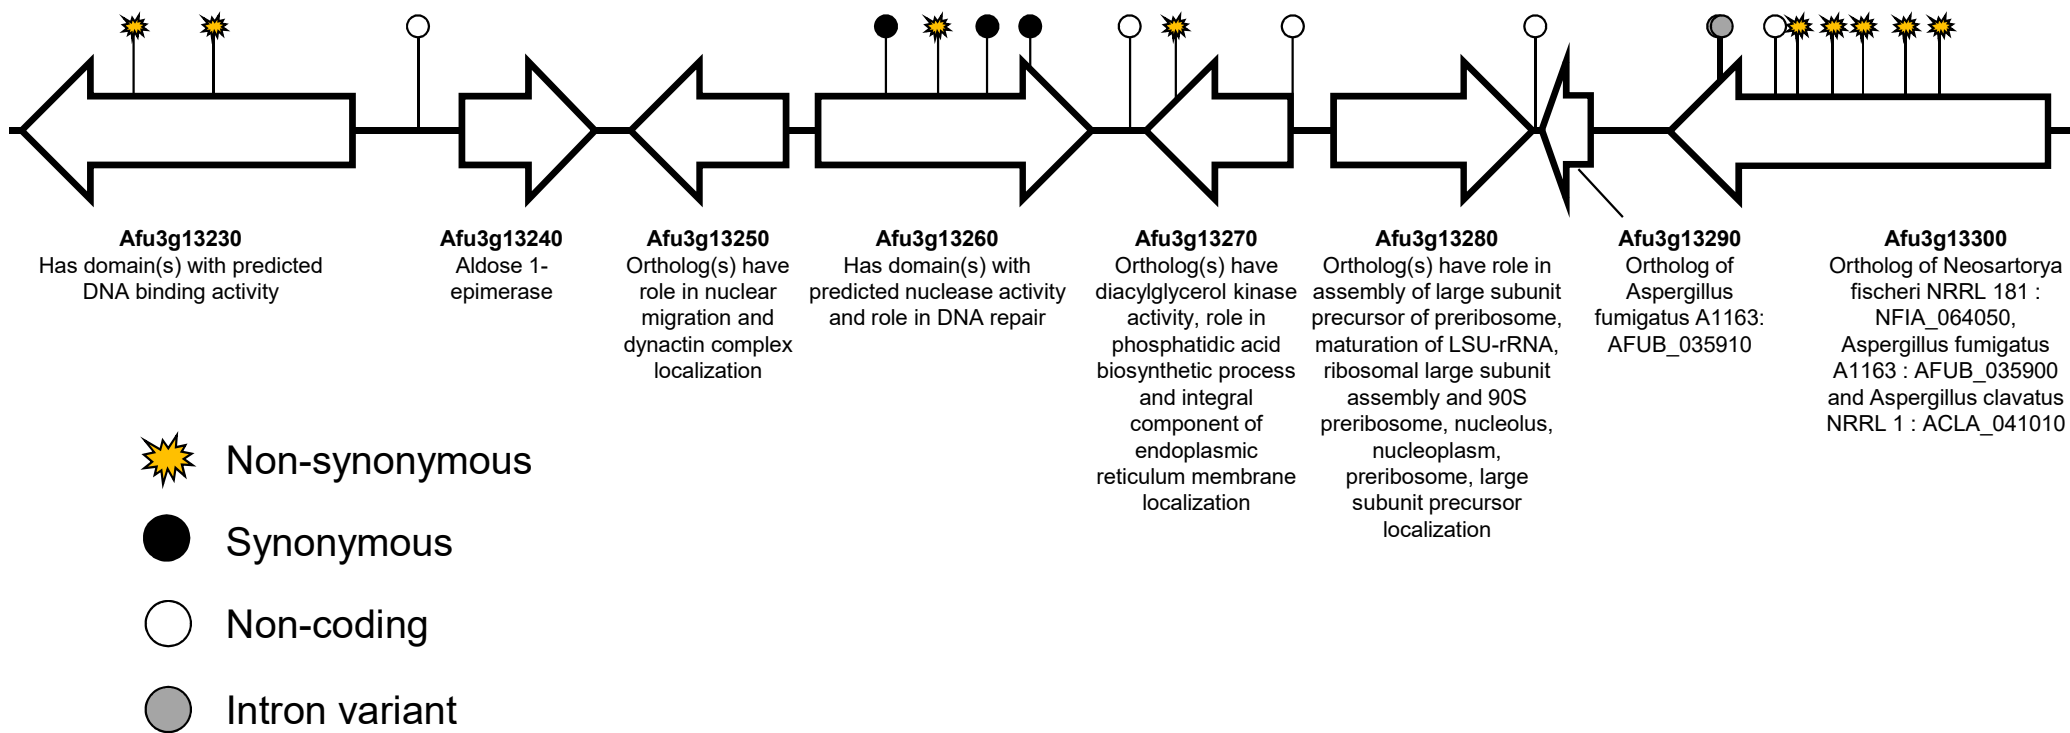

**Figure S5. Schematic of chromosome 3 region containing several SNPs significantly associated with CPE.** Arrows represent genes, with direction indication the direction of transcription. Lines with symbols represent the location and type of SNPs associated with CPE. Gene symbol and functional descriptions (as provided by FungiDB) are provided below each gene.



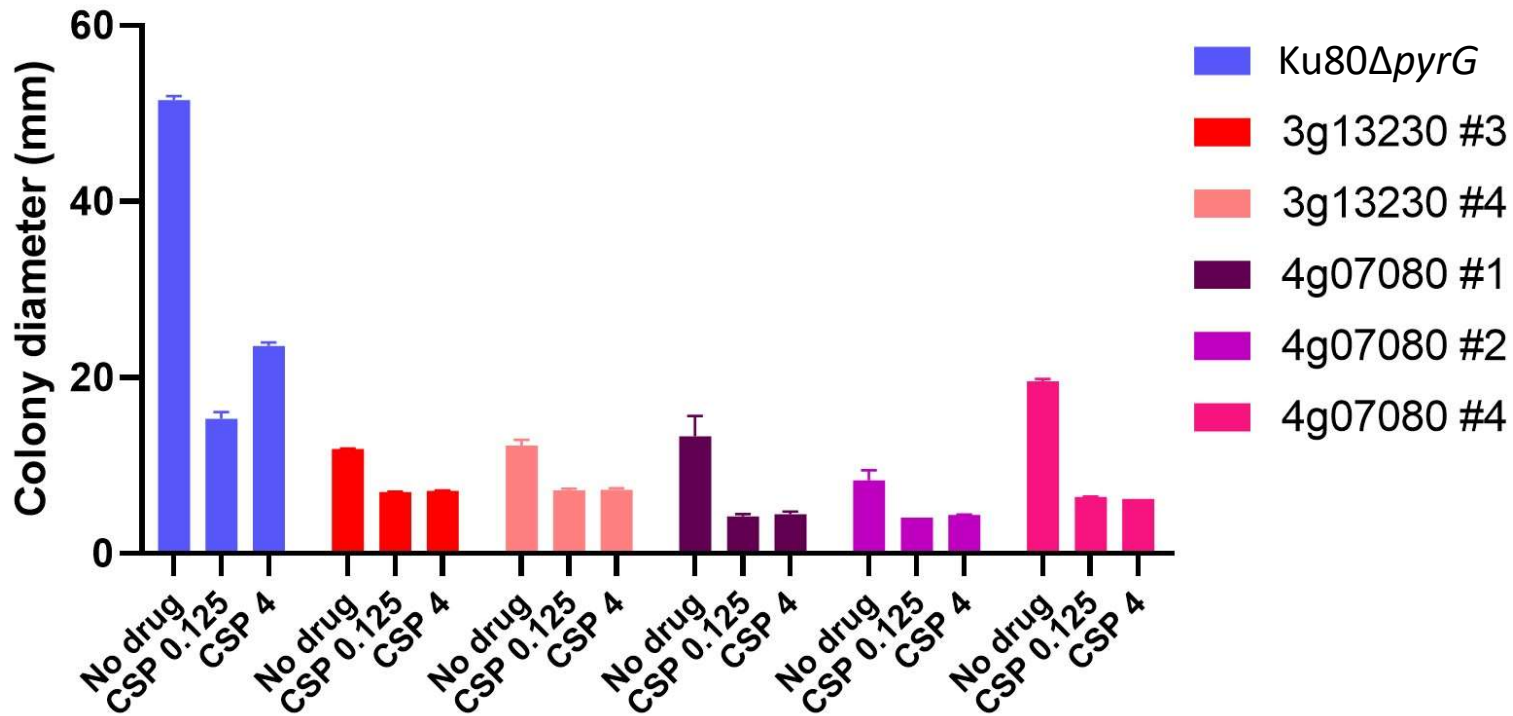

**Figure S6. Loss of CPE in  $\Delta$ Afu3g13230 and  $\Delta$ Afu4g07080 ( $\Delta$ dscP).** Ten thousand conidia were inoculated in the center of GMM agar plates with 0, 0.125 or 4  $\mu$ g/ml of caspofungin, and incubated at 37°C for 72 hours. Colony diameters were measured after 72 hours. Experiments were performed with three biological replicates per condition.

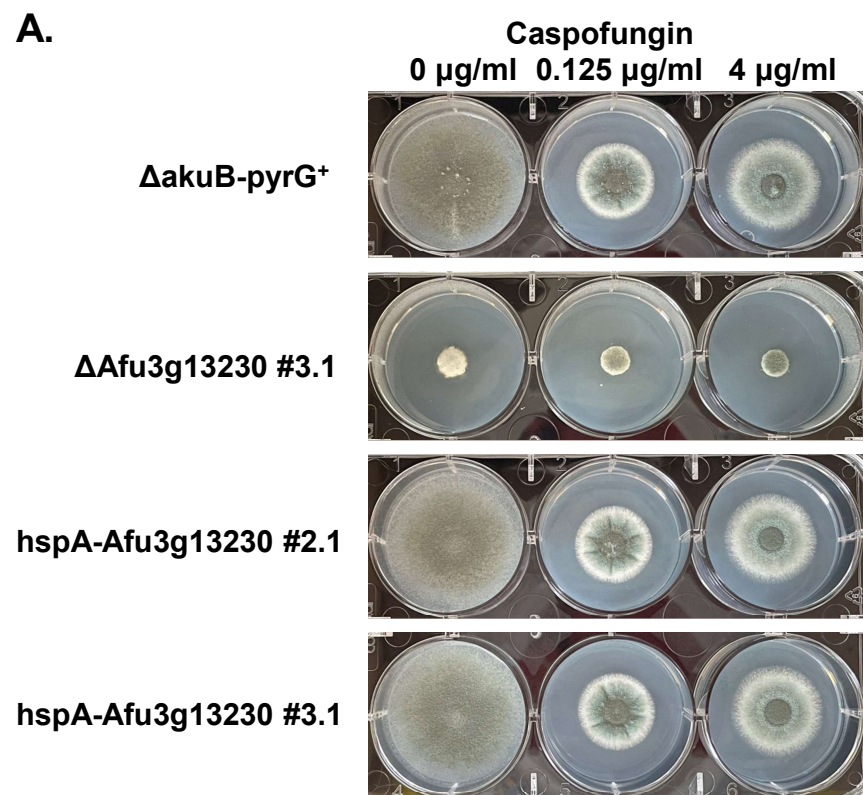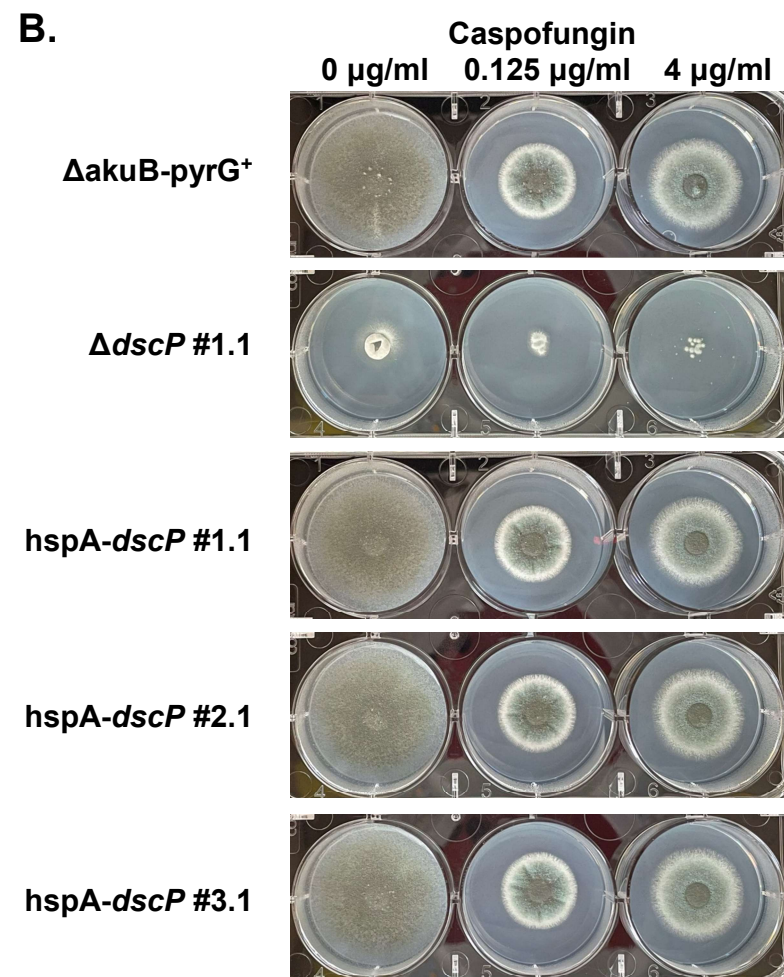

**Figure S7. Growth of Afu3g13230 (A) and *dscP* (B) wild-type and mutants.** Ten thousand conidia were inoculated in the center of GMM agar plates with 0, 0.125 or 4  $\mu\text{g/ml}$  of caspofungin, and incubated at 37°C for 72 hours.  $\Delta\text{akuB-pyrG}^+$  = the wild-type parental strain,  $\Delta\text{Afu3g13230}$  and  $\Delta\text{dscP}$  = gene deletion mutants, and  $\text{hspA-X}$  = overexpression mutants. The number after each mutant represents the independent transformant.

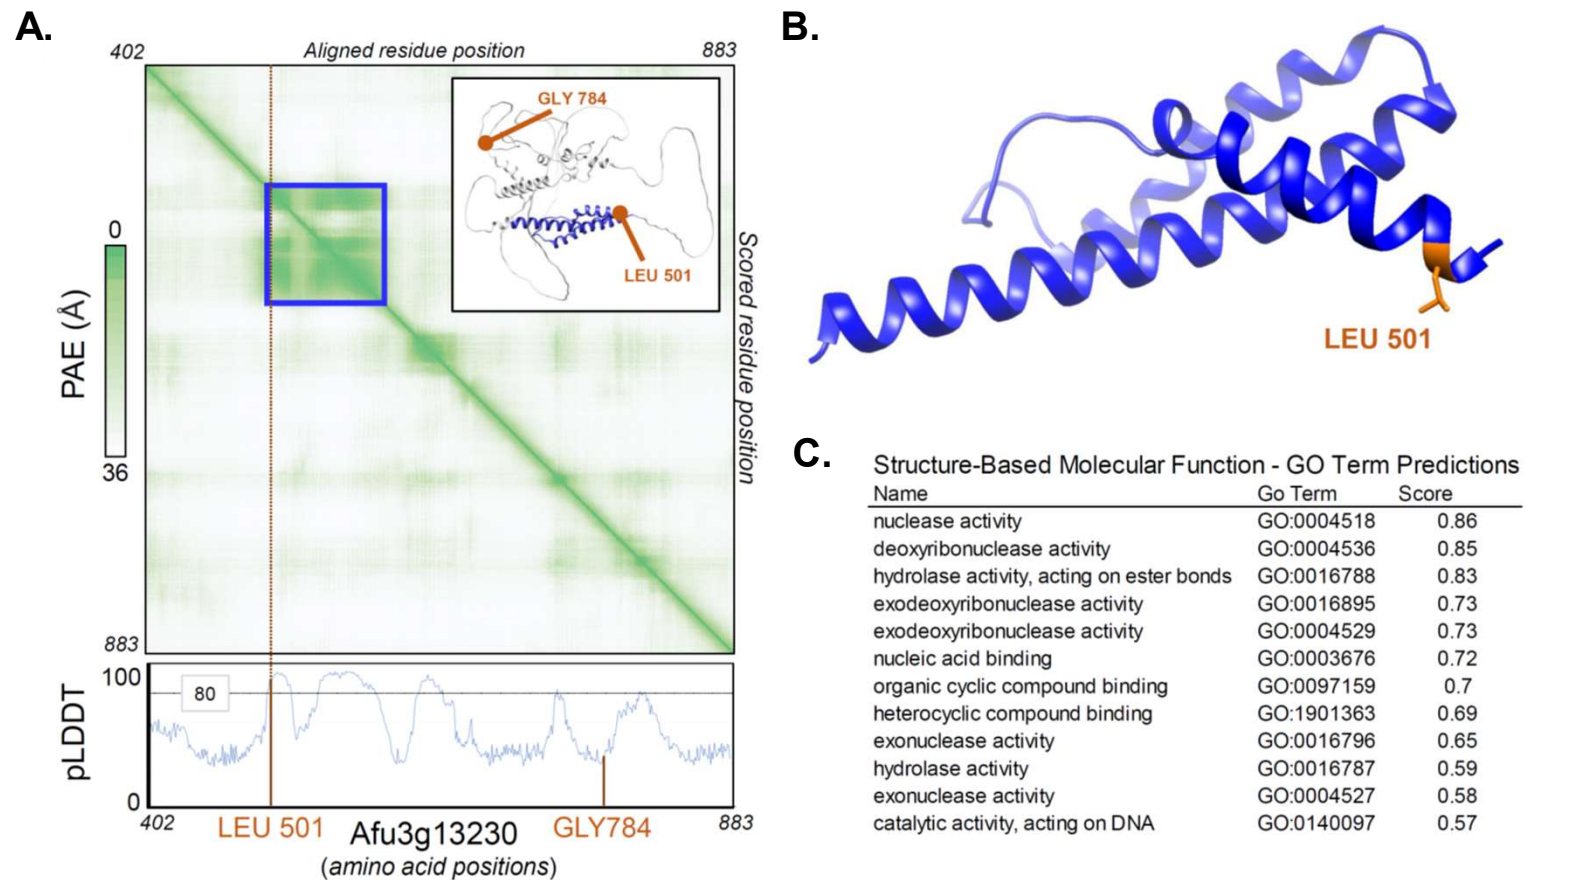

**Figure S8. AlphaFold2 model of 483 residue portion of Afu3g13230 containing two variants associated with CPE.** (A) AlphaFold2 metrics for protein model. Heatmap of predicted aligned error (PAE) for all residue pairs reveals a closely packed domain (blue box) containing Leu501. Bottom: The per-residue confidence score (pLDDT) for each residue reveals that the domain containing Leu501 comprises high confidence residues (pLDDT>80). Inset: The AlphaFold2 model of Afu3g13230 with the domain containing Leu501 highlighted in blue. (B) Detail of the structural domain identified in panel A. The position of Leu501 is highlighted with the sidechain is shown. (C) Functional classification of the identified domain by DeepFRI along with the identified GO terms and scores.

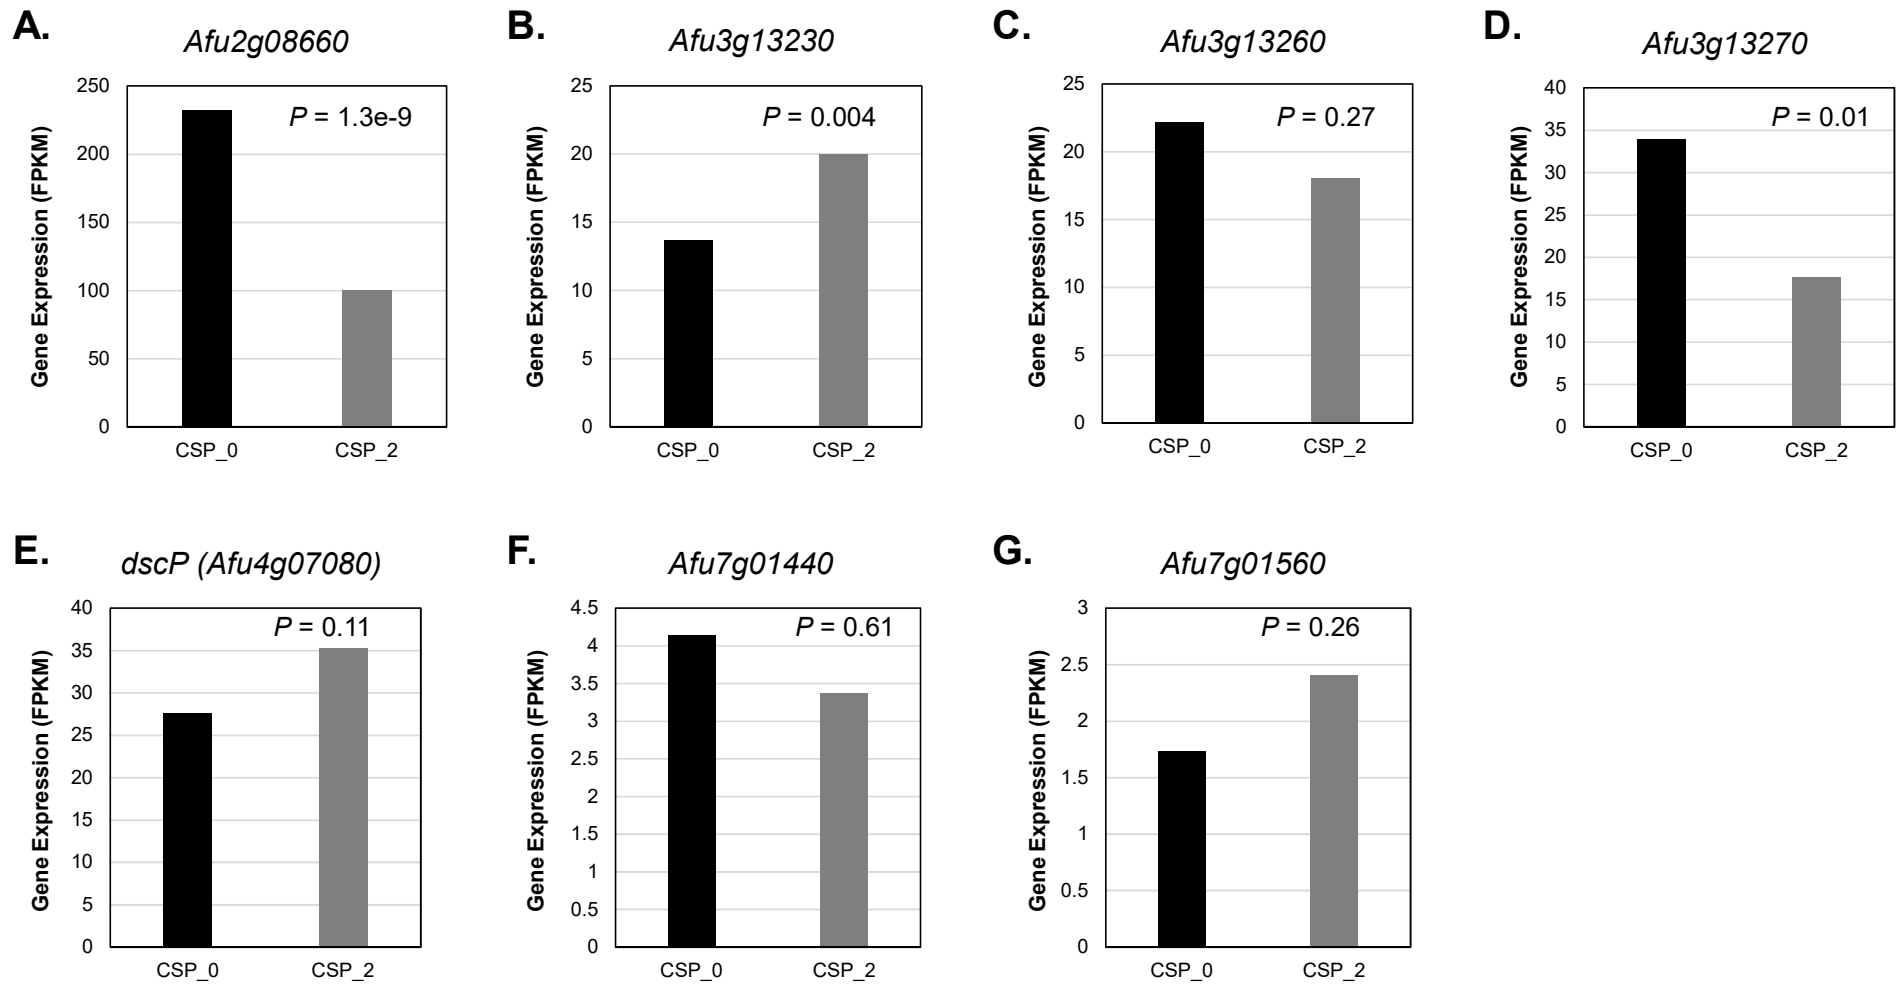

**Figure S9. Expression (FPKM) in *A. fumigatus* CEA17 on minimal media with 0 ug/ml caspofungin (black bar) and 2 ug/ml caspofungin (gray bar) for genes associated with CPE and experimentally knocked out. RNA-seq data was obtained from Valero *et al.* 2020. CSP\_0 = 0  $\mu$ M caspofungin and CSP\_2 = 2  $\mu$ M caspofungin.**
